# Supplementary material
Source: Springer Nature journal article supplement (https://www.springermedizin.de/resource/supplementary/12876_2013_1073_MOESM4_ESM.pdf/9438402)
Supplement: MOESM4 [file 9438402]

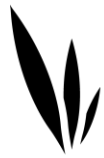

WM. K. WARREN  
**MEDICAL RESEARCH CENTER**  
 FOR CELIAC DISEASE

**Celiac Disease Screening Program and Research Study**

**SURVEY**

Thank you for agreeing to complete this survey as part of the research component of our celiac disease screening program. Filling out the survey is entirely voluntary. You are not required to answer any questions that you do not want to. The survey will remain completely anonymous. Please ask our staff research associate if you do not understand any of the questions on the survey or if you have any questions regarding this survey.

Date: \_\_\_\_\_

Subject ID: \_\_\_\_\_

FOR OFFICE USE ONLY

**Background information**

1) Gender:  Male  Female      2) Date of Birth:

3) Zip code or area of Southern California where you live: \_\_\_\_\_

4) Number of years of formal education:

No high school diploma       Some college       Graduate degree

High school /General Educational Development (GED) diploma

Completed 4-yr college

5) Occupational status: Please **choose the one** which best applies to you

Employed Full Time (32 hr or more per week)       Employed Part Time (less than 32 hr per week)       Non-paid volunteer

Homemaker       Student       Retired

Unemployed: able to work       Unemployed: unable to work

6) Field of employment and job title: \_\_\_\_\_

7) Annual Income:  <\$25,000     \$25,000-50,000     \$50,000-100,000     >\$100,000

8) Ethnic Group: Please check your ethnic group: **you may check more than one.**

American Indian/Alaskan Native

Hispanic or Latino

Arab/ Middle Eastern

Asian

Native Hawaiian or Other Pacific Islander

Indian

\_\_\_\_\_ Black                      \_\_\_\_\_ White                      \_\_\_\_\_ Japanese

9) Have any of your biologic family members (family members related by blood) been diagnosed with celiac disease? If no, please skip to question #11.

\_\_\_\_\_ **Yes**                      \_\_\_\_\_ **No**                      \_\_\_\_\_ **Don't know / unsure**

10) Tell us about your biological family members with celiac disease. If the relationship is a twin sibling, please specify identical vs. not identical.

| Person | Relationship (spouse, parent, sibling, child, aunt, uncle, first cousin) | Gender (M/F) | Age | Diagnosed with CD? (Yes/No) | Underwent biopsy? (Yes/No) | Age at diagnosis |
|--------|--------------------------------------------------------------------------|--------------|-----|-----------------------------|----------------------------|------------------|
| #1     |                                                                          |              |     |                             |                            |                  |
| #2     |                                                                          |              |     |                             |                            |                  |
| #3     |                                                                          |              |     |                             |                            |                  |
| #4     |                                                                          |              |     |                             |                            |                  |
| #5     |                                                                          |              |     |                             |                            |                  |

**Medical History**

11) This is a checklist to identify why you have not been tested until today. Read each sentence describing barriers to testing and indicate how much you agree or disagree. *Please answer each question.*

Begin each statement with:

**I have not been tested until today because...**

|                                                                                  | Strongly Disagree        | Disagree                 | Neither Agree nor Disagree | Agree                    | Strongly Agree           |
|----------------------------------------------------------------------------------|--------------------------|--------------------------|----------------------------|--------------------------|--------------------------|
| I do not have a doctor to order the test.                                        | <input type="checkbox"/> | <input type="checkbox"/> | <input type="checkbox"/>   | <input type="checkbox"/> | <input type="checkbox"/> |
| I cannot take time off from work to get tested at a doctor's office.             | <input type="checkbox"/> | <input type="checkbox"/> | <input type="checkbox"/>   | <input type="checkbox"/> | <input type="checkbox"/> |
| I have no insurance coverage to take care of the costs.                          | <input type="checkbox"/> | <input type="checkbox"/> | <input type="checkbox"/>   | <input type="checkbox"/> | <input type="checkbox"/> |
| I have insurance, but cannot afford co-payment for the test.                     | <input type="checkbox"/> | <input type="checkbox"/> | <input type="checkbox"/>   | <input type="checkbox"/> | <input type="checkbox"/> |
| I do not want my health insurance company to know about the results of the test. | <input type="checkbox"/> | <input type="checkbox"/> | <input type="checkbox"/>   | <input type="checkbox"/> | <input type="checkbox"/> |

|                                                                                               |                          |                          |                          |                          |                          |
|-----------------------------------------------------------------------------------------------|--------------------------|--------------------------|--------------------------|--------------------------|--------------------------|
| I was tested with a skin/fecal/saliva test and did not know that I should get the blood test. | <input type="checkbox"/> | <input type="checkbox"/> | <input type="checkbox"/> | <input type="checkbox"/> | <input type="checkbox"/> |
|                                                                                               |                          |                          |                          |                          |                          |

(continue to next page)

(Question #11 continued from previous page)

This is a checklist to identify why you have not been screened *with a blood test* for celiac disease until today. Read each sentence describing barriers to testing and indicate how much you agree or disagree.

*Please answer each question.*

Begin each statement with:

**I have not been tested until today because...**

|                                                                                                           | Strongly Disagree        | Disagree                 | Neither Agree nor Disagree | Agree                    | Strongly Agree           |
|-----------------------------------------------------------------------------------------------------------|--------------------------|--------------------------|----------------------------|--------------------------|--------------------------|
| I have a doctor, but he/she will not test me.                                                             | <input type="checkbox"/> | <input type="checkbox"/> | <input type="checkbox"/>   | <input type="checkbox"/> | <input type="checkbox"/> |
|                                                                                                           |                          |                          |                            |                          |                          |
| I have a doctor, but I do not think he/she knows what test to order.                                      | <input type="checkbox"/> | <input type="checkbox"/> | <input type="checkbox"/>   | <input type="checkbox"/> | <input type="checkbox"/> |
|                                                                                                           |                          |                          |                            |                          |                          |
| I did not know anything about celiac disease until recently                                               | <input type="checkbox"/> | <input type="checkbox"/> | <input type="checkbox"/>   | <input type="checkbox"/> | <input type="checkbox"/> |
|                                                                                                           |                          |                          |                            |                          |                          |
| I did not know that I was at risk for celiac disease.                                                     | <input type="checkbox"/> | <input type="checkbox"/> | <input type="checkbox"/>   | <input type="checkbox"/> | <input type="checkbox"/> |
|                                                                                                           |                          |                          |                            |                          |                          |
| I knew that I may be at risk for celiac disease, but I did not know there was a screening test available. | <input type="checkbox"/> | <input type="checkbox"/> | <input type="checkbox"/>   | <input type="checkbox"/> | <input type="checkbox"/> |
|                                                                                                           |                          |                          |                            |                          |                          |
| I was told before that I did not need to get tested because of my race or ethnicity.                      | <input type="checkbox"/> | <input type="checkbox"/> | <input type="checkbox"/>   | <input type="checkbox"/> | <input type="checkbox"/> |
|                                                                                                           |                          |                          |                            |                          |                          |
| I do not have any symptoms and so have not wanted to get tested.                                          | <input type="checkbox"/> | <input type="checkbox"/> | <input type="checkbox"/>   | <input type="checkbox"/> | <input type="checkbox"/> |
|                                                                                                           |                          |                          |                            |                          |                          |
|                                                                                                           | Strongly Disagree        | Disagree                 | Neither Agree nor Disagree | Agree                    | Strongly Agree           |
| I do/did not know where to get tested                                                                     | <input type="checkbox"/> | <input type="checkbox"/> | <input type="checkbox"/>   | <input type="checkbox"/> | <input type="checkbox"/> |
|                                                                                                           |                          |                          |                            |                          |                          |
| I do/did not want to see a doctor for testing.                                                            | <input type="checkbox"/> | <input type="checkbox"/> | <input type="checkbox"/>   | <input type="checkbox"/> | <input type="checkbox"/> |
|                                                                                                           |                          |                          |                            |                          |                          |
| I have been scared to get tested until recently or did not want to know the results.                      | <input type="checkbox"/> | <input type="checkbox"/> | <input type="checkbox"/>   | <input type="checkbox"/> | <input type="checkbox"/> |
|                                                                                                           | <input type="checkbox"/> | <input type="checkbox"/> | <input type="checkbox"/>   | <input type="checkbox"/> | <input type="checkbox"/> |
| I was not motivated to get tested until recently.                                                         |                          |                          |                            |                          |                          |
|                                                                                                           | <input type="checkbox"/> | <input type="checkbox"/> | <input type="checkbox"/>   | <input type="checkbox"/> | <input type="checkbox"/> |
| Other:                                                                                                    |                          |                          |                            |                          |                          |

12) In the past four weeks, have you experienced the following health problems?

- For those health problems that you *have experienced in the past four weeks*, please *select the duration* of time that you have experienced the health problem.
- For those health problems that you *have not experienced in the past four weeks*, please select “*not applicable.*”
- Please choose an answer for each health problem.

| HEALTH PROBLEM                                           | DURATION OF HEALTH PROBLEMS THAT LED TO TESTING |                          |                          |                          |                          |
|----------------------------------------------------------|-------------------------------------------------|--------------------------|--------------------------|--------------------------|--------------------------|
|                                                          | Not applicable                                  | 2 weeks to 6 months      | 6 months to 1 year       | 1 to 3 years             | More than 3 years        |
| <i>Gastro-intestinal (GI) - related health problems:</i> |                                                 |                          |                          |                          |                          |
| Abdominal pain & cramping                                | <input type="checkbox"/>                        | <input type="checkbox"/> | <input type="checkbox"/> | <input type="checkbox"/> | <input type="checkbox"/> |
| Diarrhea                                                 | <input type="checkbox"/>                        | <input type="checkbox"/> | <input type="checkbox"/> | <input type="checkbox"/> | <input type="checkbox"/> |
| Constipation                                             | <input type="checkbox"/>                        | <input type="checkbox"/> | <input type="checkbox"/> | <input type="checkbox"/> | <input type="checkbox"/> |
| Gas & bloating                                           | <input type="checkbox"/>                        | <input type="checkbox"/> | <input type="checkbox"/> | <input type="checkbox"/> | <input type="checkbox"/> |
| Nausea                                                   | <input type="checkbox"/>                        | <input type="checkbox"/> | <input type="checkbox"/> | <input type="checkbox"/> | <input type="checkbox"/> |
| Vomiting                                                 | <input type="checkbox"/>                        | <input type="checkbox"/> | <input type="checkbox"/> | <input type="checkbox"/> | <input type="checkbox"/> |
| Weight loss (unintentional)                              | <input type="checkbox"/>                        | <input type="checkbox"/> | <input type="checkbox"/> | <input type="checkbox"/> | <input type="checkbox"/> |
| <i>Health problems outside of the GI tract:</i>          |                                                 |                          |                          |                          |                          |
| Anxiety                                                  | <input type="checkbox"/>                        | <input type="checkbox"/> | <input type="checkbox"/> | <input type="checkbox"/> | <input type="checkbox"/> |
| Bone pain                                                | <input type="checkbox"/>                        | <input type="checkbox"/> | <input type="checkbox"/> | <input type="checkbox"/> | <input type="checkbox"/> |
| Depression                                               | <input type="checkbox"/>                        | <input type="checkbox"/> | <input type="checkbox"/> | <input type="checkbox"/> | <input type="checkbox"/> |
| Fatigue                                                  | <input type="checkbox"/>                        | <input type="checkbox"/> | <input type="checkbox"/> | <input type="checkbox"/> | <input type="checkbox"/> |
| Infertility                                              | <input type="checkbox"/>                        | <input type="checkbox"/> | <input type="checkbox"/> | <input type="checkbox"/> | <input type="checkbox"/> |
| Itchy skin rash                                          | <input type="checkbox"/>                        | <input type="checkbox"/> | <input type="checkbox"/> | <input type="checkbox"/> | <input type="checkbox"/> |
| Joint pain                                               | <input type="checkbox"/>                        | <input type="checkbox"/> | <input type="checkbox"/> | <input type="checkbox"/> | <input type="checkbox"/> |
| Mouth sores                                              | <input type="checkbox"/>                        | <input type="checkbox"/> | <input type="checkbox"/> | <input type="checkbox"/> | <input type="checkbox"/> |
| Muscle cramps/pain                                       | <input type="checkbox"/>                        | <input type="checkbox"/> | <input type="checkbox"/> | <input type="checkbox"/> | <input type="checkbox"/> |
| Numbness or tingling in fingers & toes                   | <input type="checkbox"/>                        | <input type="checkbox"/> | <input type="checkbox"/> | <input type="checkbox"/> | <input type="checkbox"/> |
| Poor dental enamel formation (pitting, banding)          | <input type="checkbox"/>                        | <input type="checkbox"/> | <input type="checkbox"/> | <input type="checkbox"/> | <input type="checkbox"/> |
| Recurring headaches or migraines                         | <input type="checkbox"/>                        | <input type="checkbox"/> | <input type="checkbox"/> | <input type="checkbox"/> | <input type="checkbox"/> |
| Seizures                                                 | <input type="checkbox"/>                        | <input type="checkbox"/> | <input type="checkbox"/> | <input type="checkbox"/> | <input type="checkbox"/> |
| Tooth discoloration                                      | <input type="checkbox"/>                        | <input type="checkbox"/> | <input type="checkbox"/> | <input type="checkbox"/> | <input type="checkbox"/> |
| Translucent-looking teeth                                | <input type="checkbox"/>                        | <input type="checkbox"/> | <input type="checkbox"/> | <input type="checkbox"/> | <input type="checkbox"/> |
| Other_____                                               | <input type="checkbox"/>                        | <input type="checkbox"/> | <input type="checkbox"/> | <input type="checkbox"/> | <input type="checkbox"/> |

13) Has ***your health care professional ever told you*** that you have the following health problems?

|                          |                                                                                                       |
|--------------------------|-------------------------------------------------------------------------------------------------------|
| <input type="checkbox"/> | Addison's disease                                                                                     |
| <input type="checkbox"/> | Anemia caused by B12 or Folate deficiency                                                             |
| <input type="checkbox"/> | Anemia caused by iron deficiency                                                                      |
| <input type="checkbox"/> | Anemia : I don't know the cause                                                                       |
| <input type="checkbox"/> | Anemia caused by something other than iron, B12, or folate deficiency                                 |
| <input type="checkbox"/> | Anxiety                                                                                               |
| <input type="checkbox"/> | Autoimmune hepatitis                                                                                  |
| <input type="checkbox"/> | Autoimmune thyroid disease (hyperthyroidism, hypothyroidism, Grave's disease, Hashimotos thyroiditis) |
| <input type="checkbox"/> | Bone disease, osteoporosis or low bone mineral density test (before age of 50)                        |
| <input type="checkbox"/> | Chronic Fatigue Syndrome                                                                              |
| <input type="checkbox"/> | Crohn's disease or ulcerative colitis                                                                 |
| <input type="checkbox"/> | Cryptogenic liver disease                                                                             |
| <input type="checkbox"/> | Depression                                                                                            |
| <input type="checkbox"/> | Dermatitis herpetiformis                                                                              |
| <input type="checkbox"/> | Fibromyalgia                                                                                          |
| <input type="checkbox"/> | IgA Deficiency                                                                                        |
| <input type="checkbox"/> | Irritable Bowel Syndrome (IBS)                                                                        |
| <input type="checkbox"/> | Lupus Erythematosus (SLE)                                                                             |
| <input type="checkbox"/> | Primary biliary cirrhosis                                                                             |
| <input type="checkbox"/> | Primary sclerosing cholangitis                                                                        |
| <input type="checkbox"/> | Sjogren's syndrome                                                                                    |
| <input type="checkbox"/> | Type I insulin dependent diabetes (juvenile diabetes)                                                 |
| <input type="checkbox"/> | Unexplained elevated transaminase levels                                                              |
| <input type="checkbox"/> | Unexplained infertility                                                                               |
| <input type="checkbox"/> | Other: _____                                                                                          |

14) How would you rate your overall health on a scale of 1-5?

5 \_\_\_\_\_ 4 \_\_\_\_\_ 3 \_\_\_\_\_ 2 \_\_\_\_\_ 1 \_\_\_\_\_  
(Excellent) (Very Good) (Good) (Fair) (Poor)

15) Please check any food allergies you might have:

|                                                           |                                                               |
|-----------------------------------------------------------|---------------------------------------------------------------|
| <input type="checkbox"/> I do not have any food allergies | <input type="checkbox"/> Soybeans                             |
| <input type="checkbox"/> Crustacean shellfish             | <input type="checkbox"/> Tree nuts (almonds, walnuts, pecans) |
| <input type="checkbox"/> Eggs                             | <input type="checkbox"/> Wheat                                |
| <input type="checkbox"/> Fish                             | <input type="checkbox"/> Corn                                 |
| <input type="checkbox"/> Milk                             | <input type="checkbox"/> Other: _____                         |
| <input type="checkbox"/> Peanuts                          |                                                               |

16) How did you hear about the Warren Center Screening Program for Celiac Disease?

|                                    |                                               |
|------------------------------------|-----------------------------------------------|
| <input type="checkbox"/> Family    | <input type="checkbox"/> Flyer                |
| <input type="checkbox"/> Friend    | <input type="checkbox"/> Support group        |
| <input type="checkbox"/> Internet  | <input type="checkbox"/> Health care provider |
| <input type="checkbox"/> Newspaper | <input type="checkbox"/> Other: _____         |

By returning this form you have agreed to participate in this research project which involves the use of your blood test results and survey results to better understand barriers to testing in people at high risk for celiac disease. Whether you participate or not, you will receive the results of your blood test via a letter that is mailed to your home from the Wm. K. Warren Medical Research Center for Celiac Disease.

**Thank you for your time and efforts!**
